# Supplementary material for: Cyclic acetals as cleavable linkers for affinity capture
Source: Royal Society of Chemistry journal article supplement (doi:10.1039/c5ob01056j), 2015-01-01

## Cyclic acetals as cleavable linkers for affinity capture

Siyeon Lee,<sup>a</sup> Wei Wang,<sup>a</sup> Younjoo Lee,<sup>a</sup> and Nicole S. Sampson<sup>\*,a</sup>

### Table of contents

|                                                                                      | Page  |
|--------------------------------------------------------------------------------------|-------|
| Figure S1. Cleavage test with BSA- <b>7c</b> in 1M guanidine/1% TFA.....             | 2     |
| Figure S2. Further modification of the RNase A aldehyde tag .....                    | 2     |
| <sup>1</sup> H and <sup>13</sup> C NMR spectra of acetal <b>2</b> .....              | 3-4   |
| <sup>1</sup> H and <sup>13</sup> C NMR spectra of trifluoroacetamide <b>5a</b> ..... | 5-6   |
| <sup>1</sup> H and <sup>13</sup> C NMR spectra of trifluoroacetamide <b>5b</b> ..... | 7-8   |
| <sup>1</sup> H and <sup>13</sup> C NMR spectra of amine <b>6a</b> .....              | 9-10  |
| <sup>1</sup> H and <sup>13</sup> C NMR spectra of amine <b>6b</b> .....              | 11-12 |
| <sup>1</sup> H and <sup>13</sup> C NMR spectra of amide <b>7a</b> .....              | 13-14 |
| <sup>1</sup> H and <sup>13</sup> C NMR spectra of amide <b>7b</b> .....              | 15-16 |
| <sup>1</sup> H and <sup>13</sup> C NMR spectra of amide <b>7c</b> .....              | 17-18 |

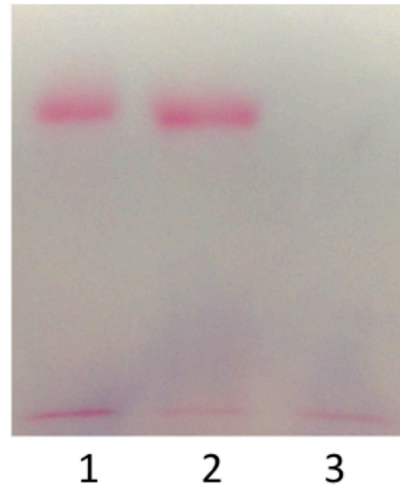

**Figure S1.** Cleavage of BSA-7c in the presence of 1M guanidine. Lane 1, BSA-7c captured on streptavidin-agarose beads; lane 2, supernatant from BSA-7c incubated in 1M guanidine/1% TFA at 37 °C for 1 hour; lane 3, streptavidin-agarose beads with captured BSA-7c after 1M guanidine/TFA incubation.

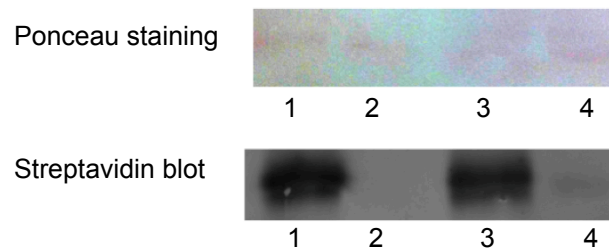

**Figure S2.** Further modification of the RNase aldehyde tag. Lane 1, RNase A-7c captured on streptavidin-agarose beads; lane 2, supernatant from RNase A-7c incubated in 1% TFA at 37 °C for 1 hour; lane 3, RNase A aldehyde after reaction with alkoxyamine-PEG-biotin at pH 5, 37 °C for 4 hours; lane 4, native RNase A subjected to the same alkoxyamine-PEG-biotin labeling reaction.

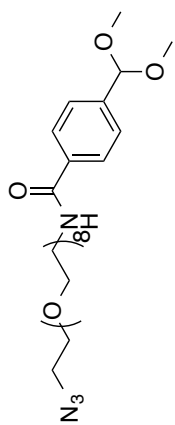

**Acetal 2**

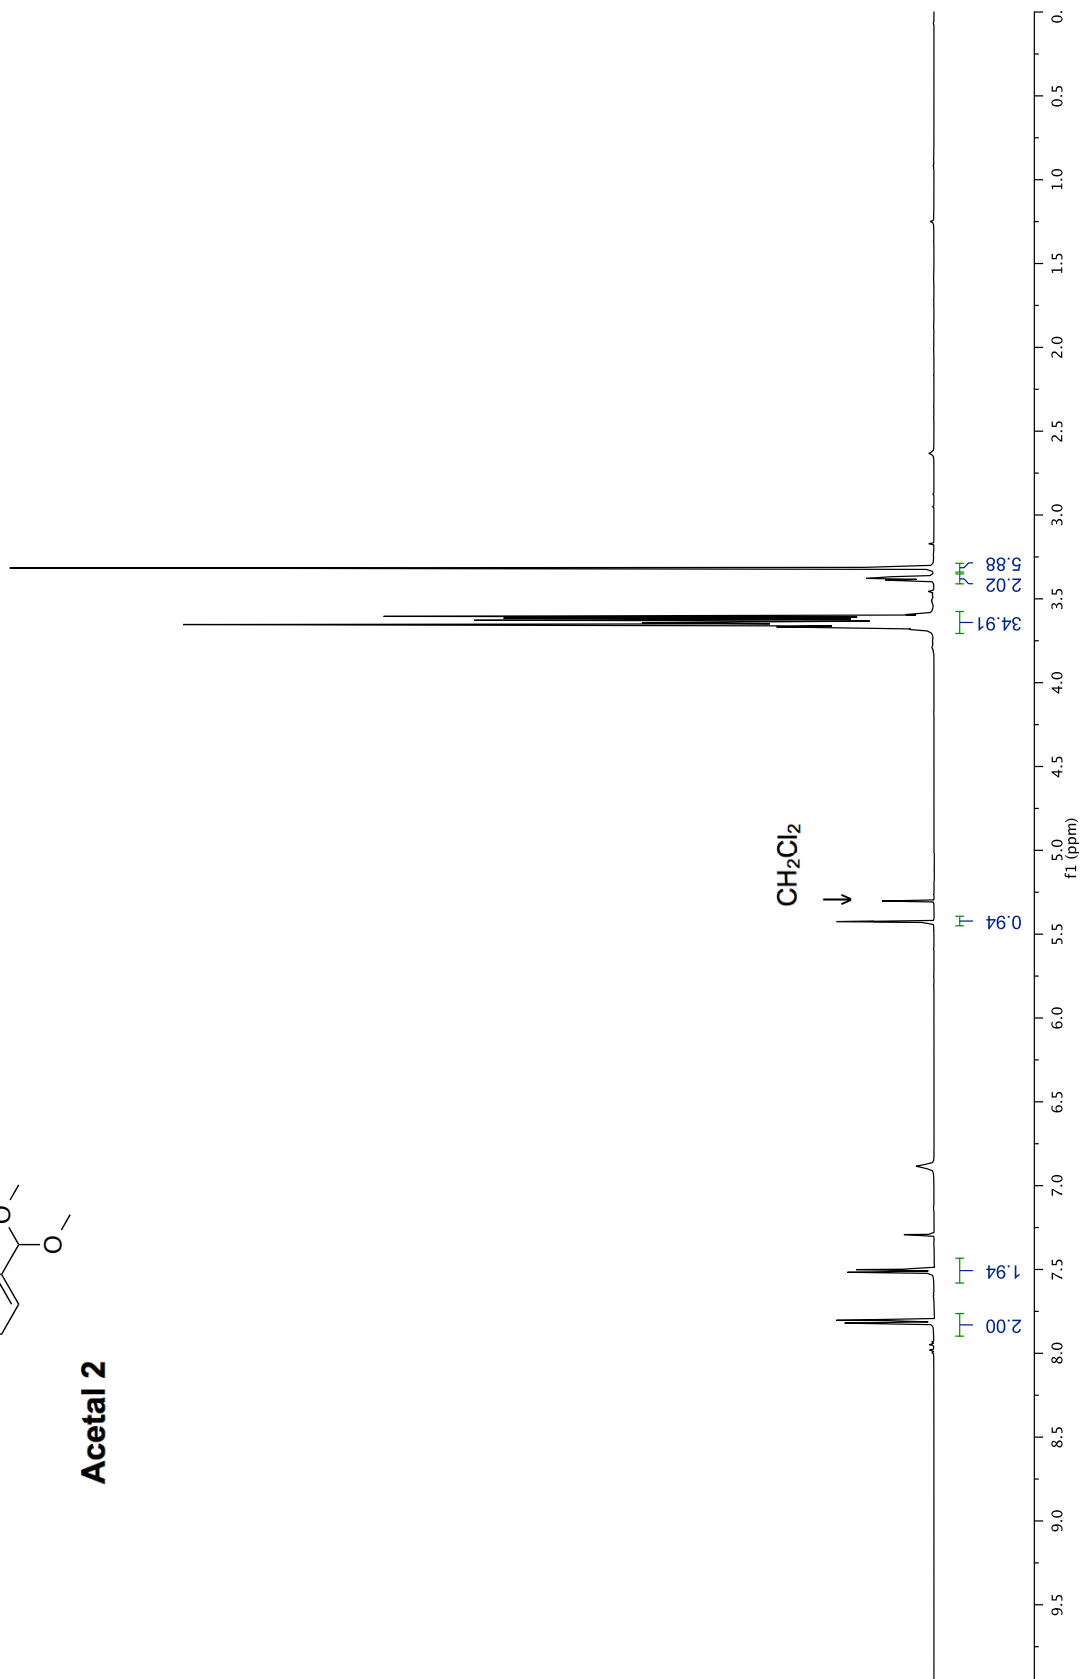

$^1\text{H}$  NMR spectrum of **acetal 2**

<sup>13</sup>C NMR Spectrum of acetal 2

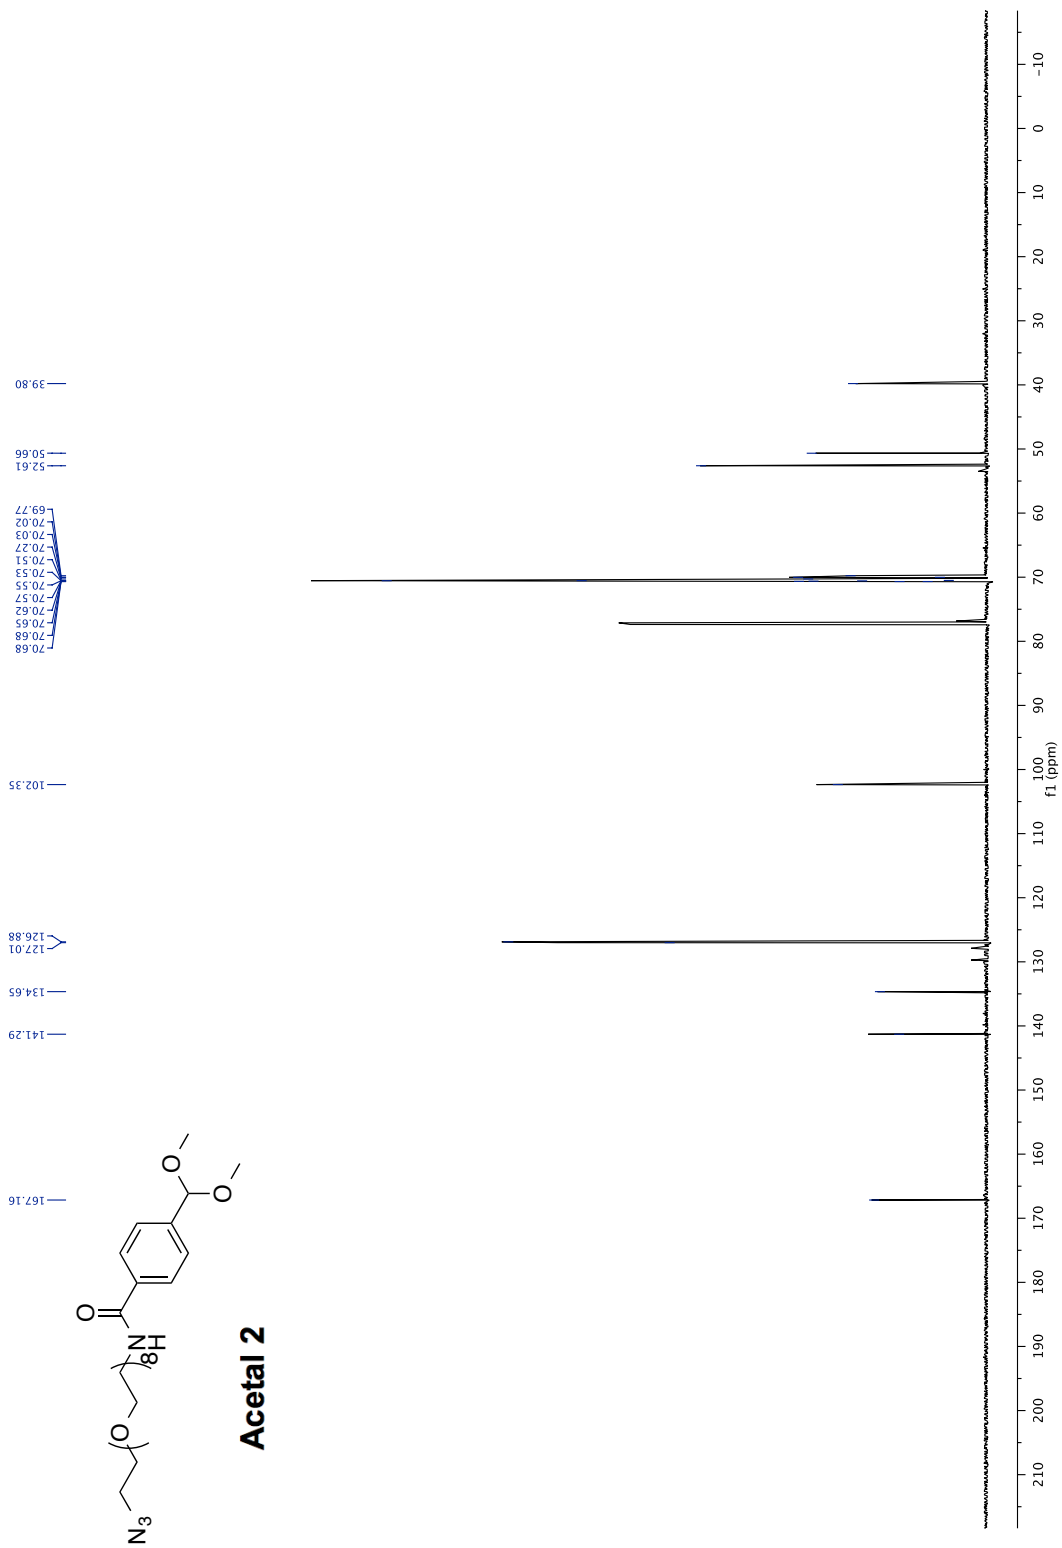

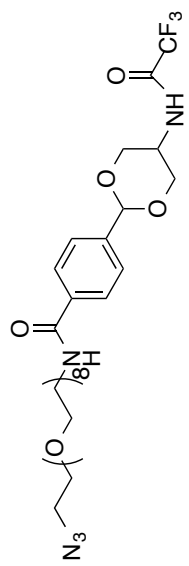

**Trifluoroacetamide 5a**

$^1\text{H}$  NMR Spectrum of **trifluoroacetamide 5a**

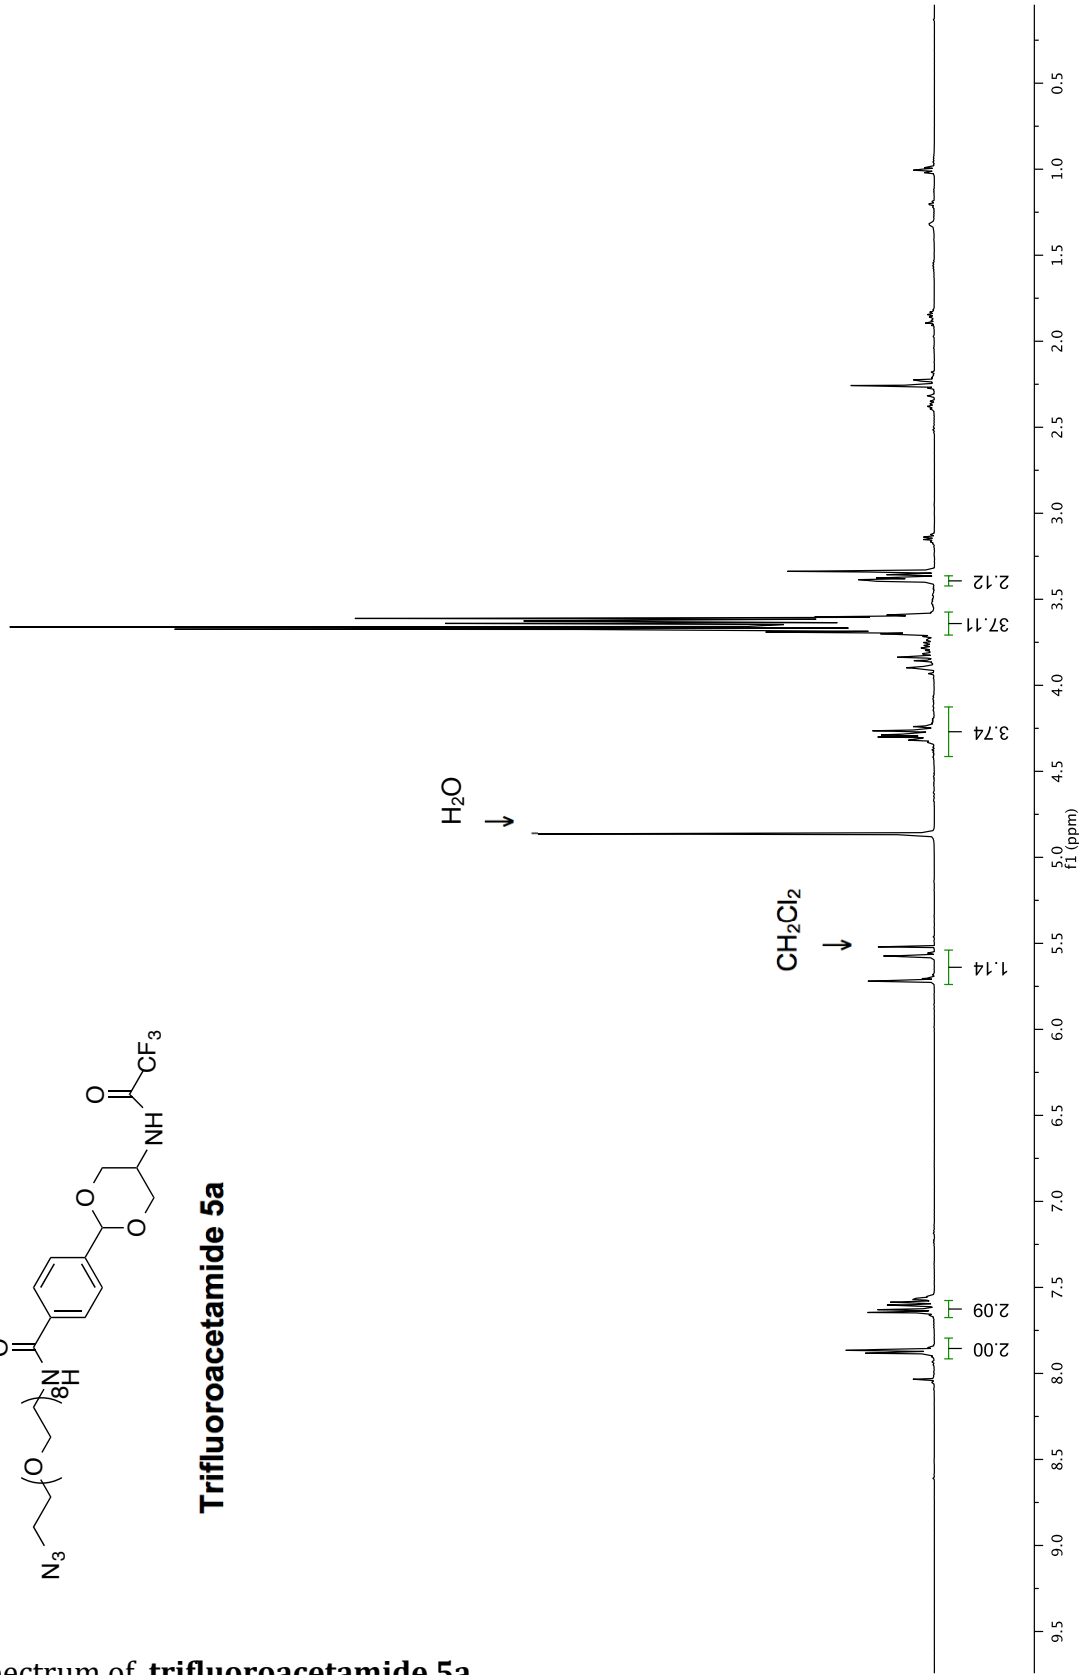

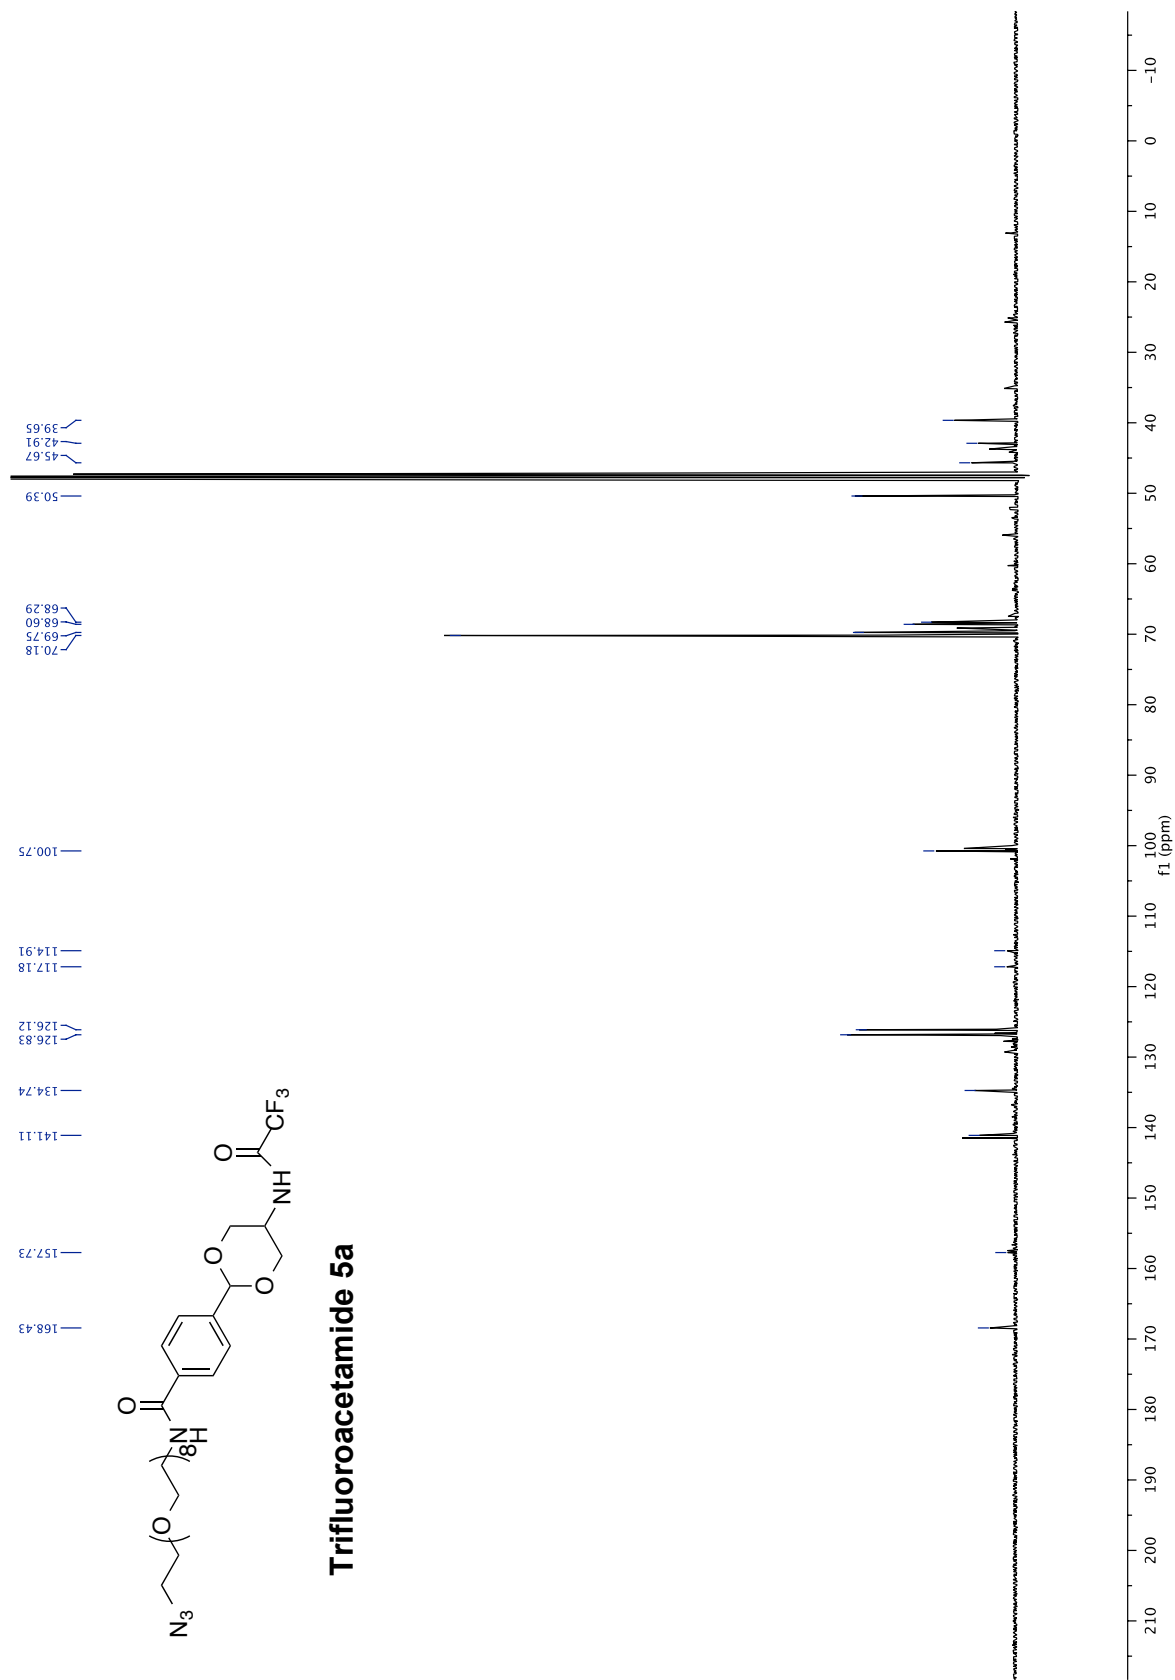

<sup>13</sup>C NMR Spectrum of trifluoroacetamide 5a

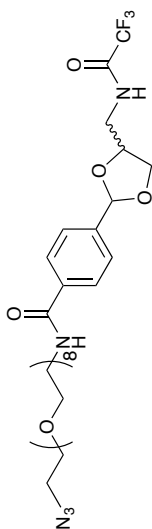

**Trifluoroacetamide 5b**

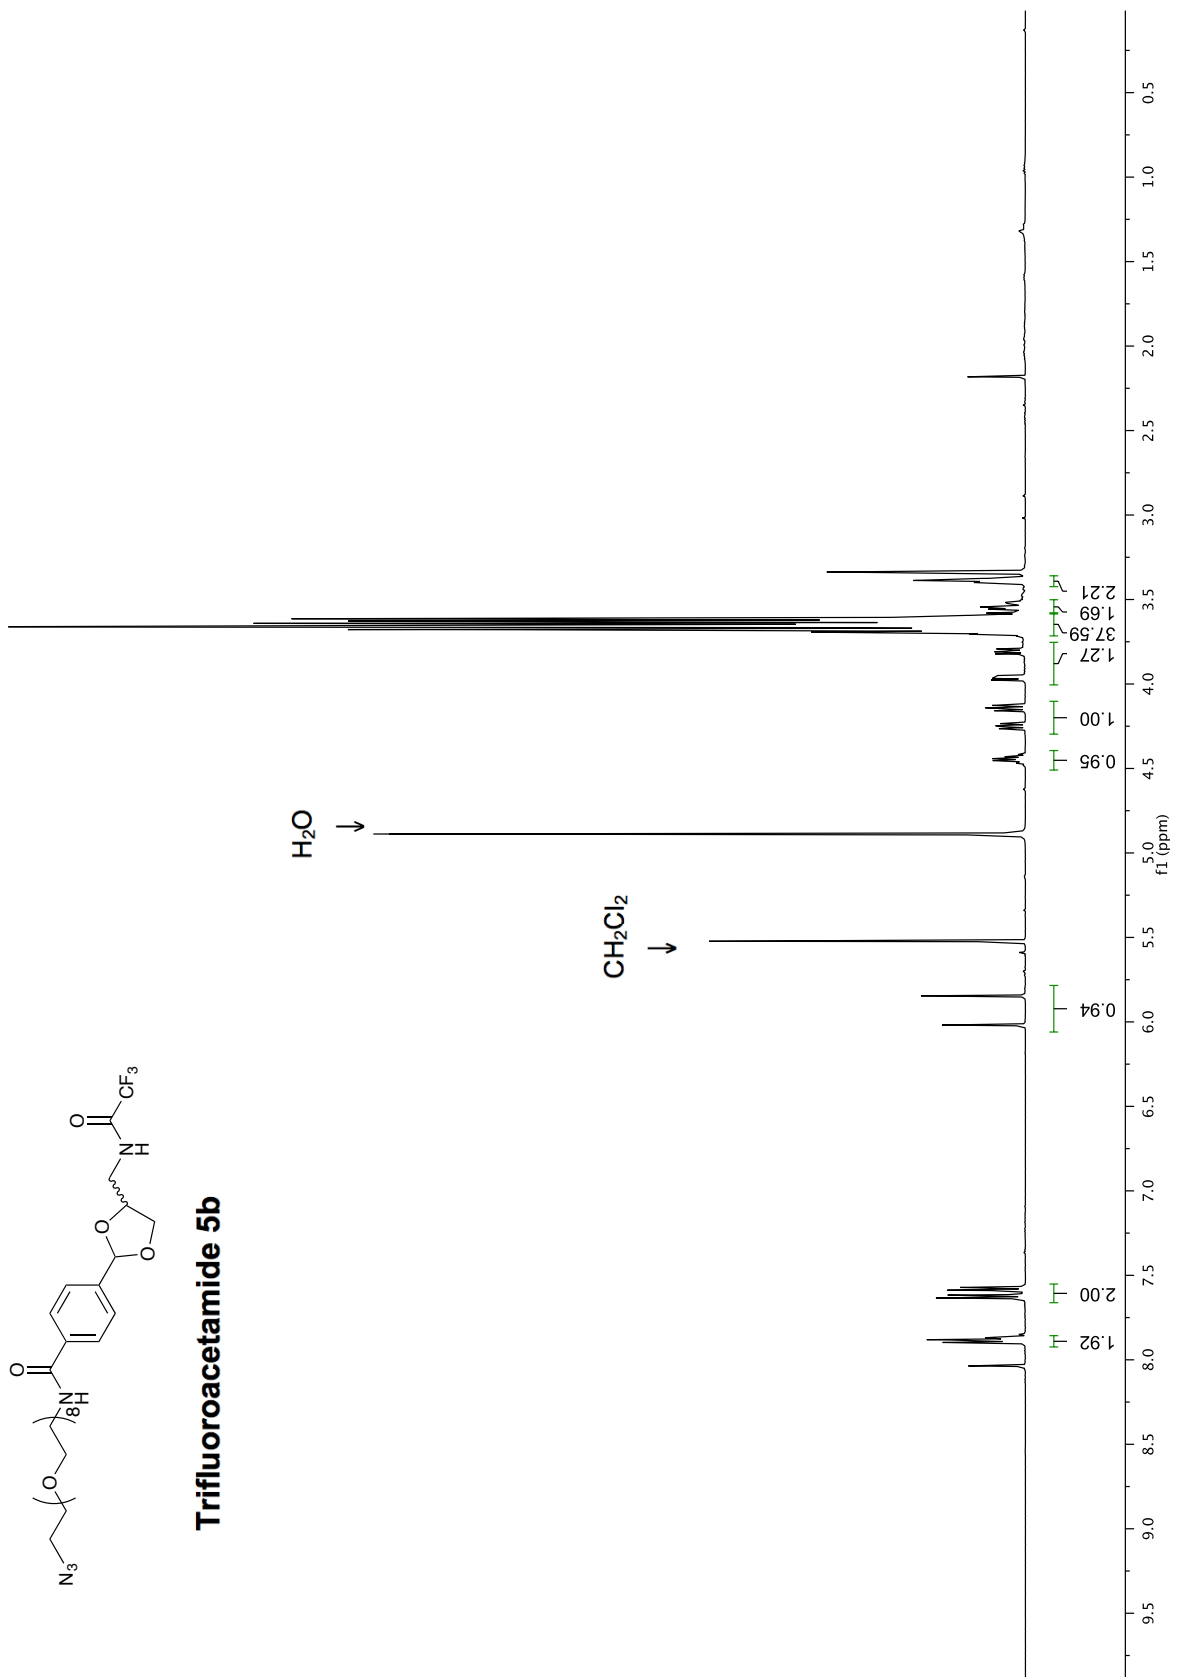

$^1\text{H}$  NMR Spectrum of **trifluoroacetamide 5b**

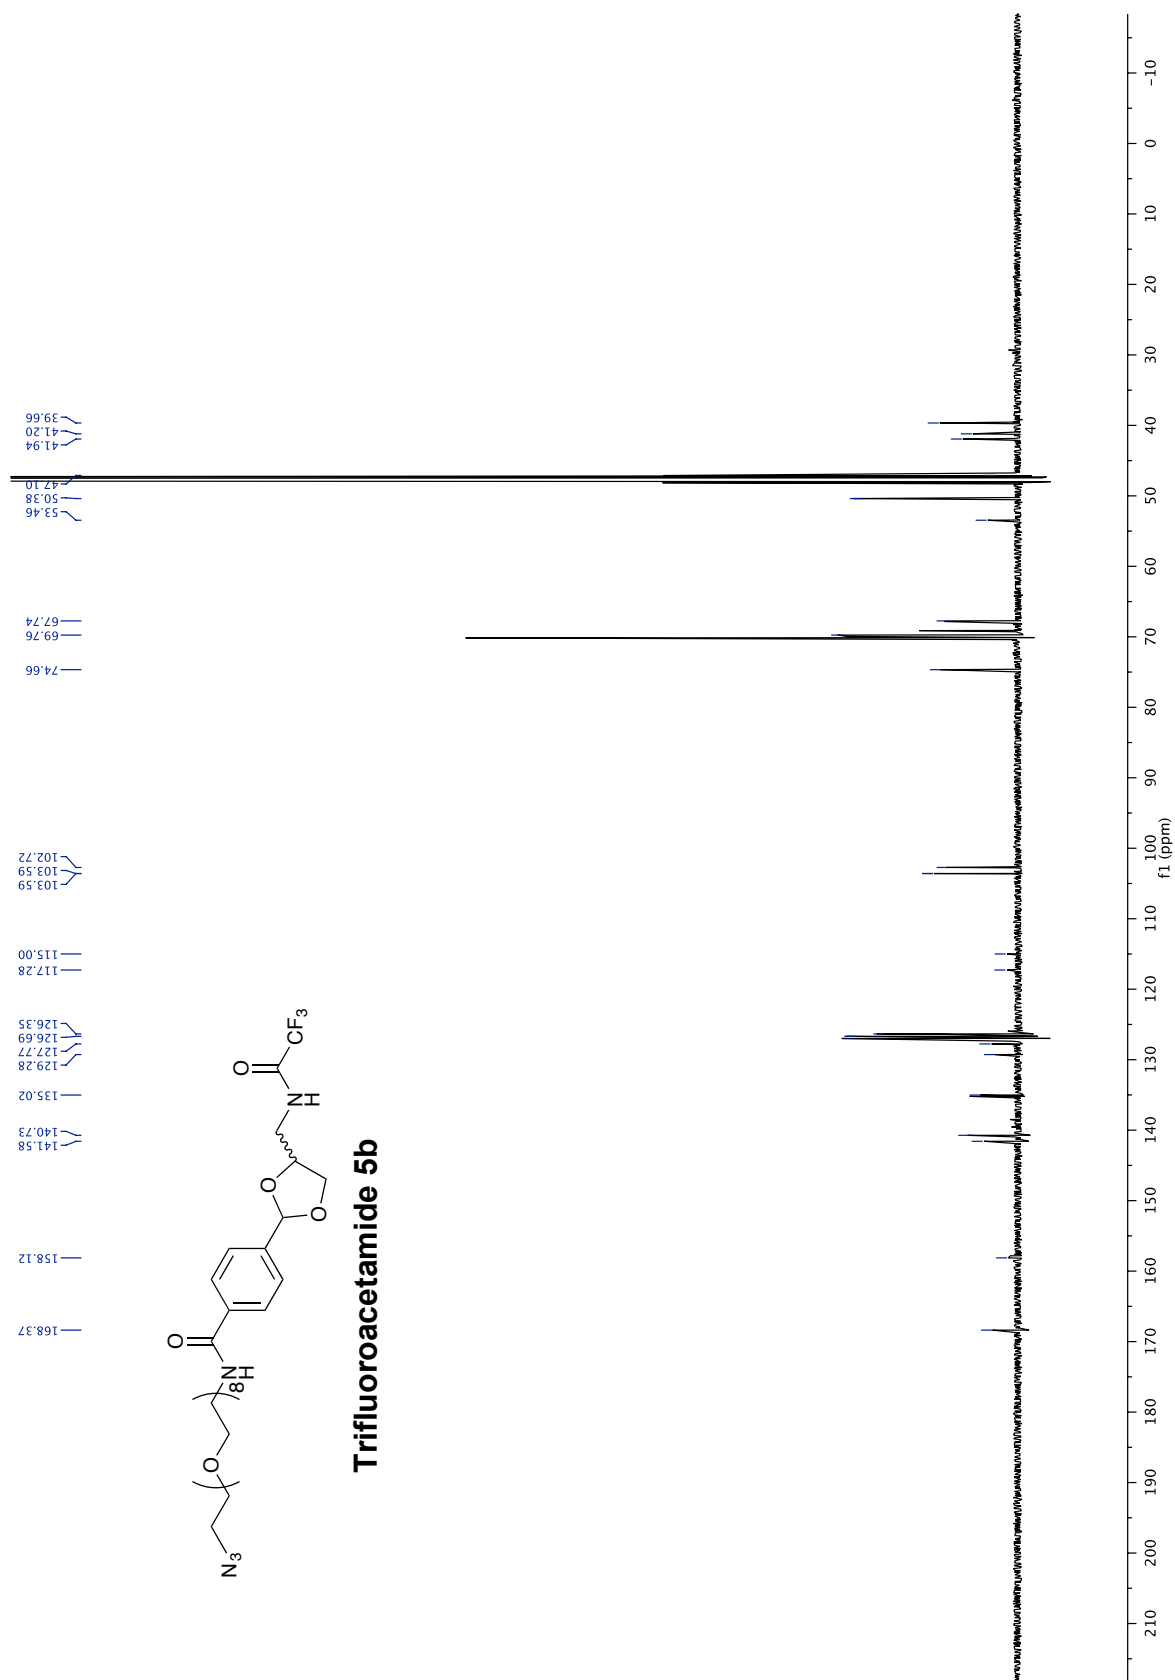

<sup>13</sup>C NMR Spectrum of trifluoroacetamide 5b



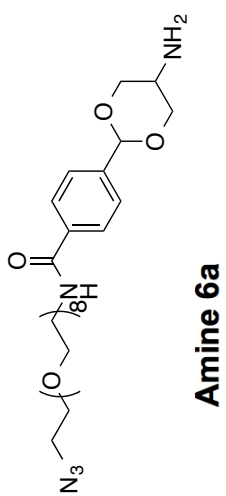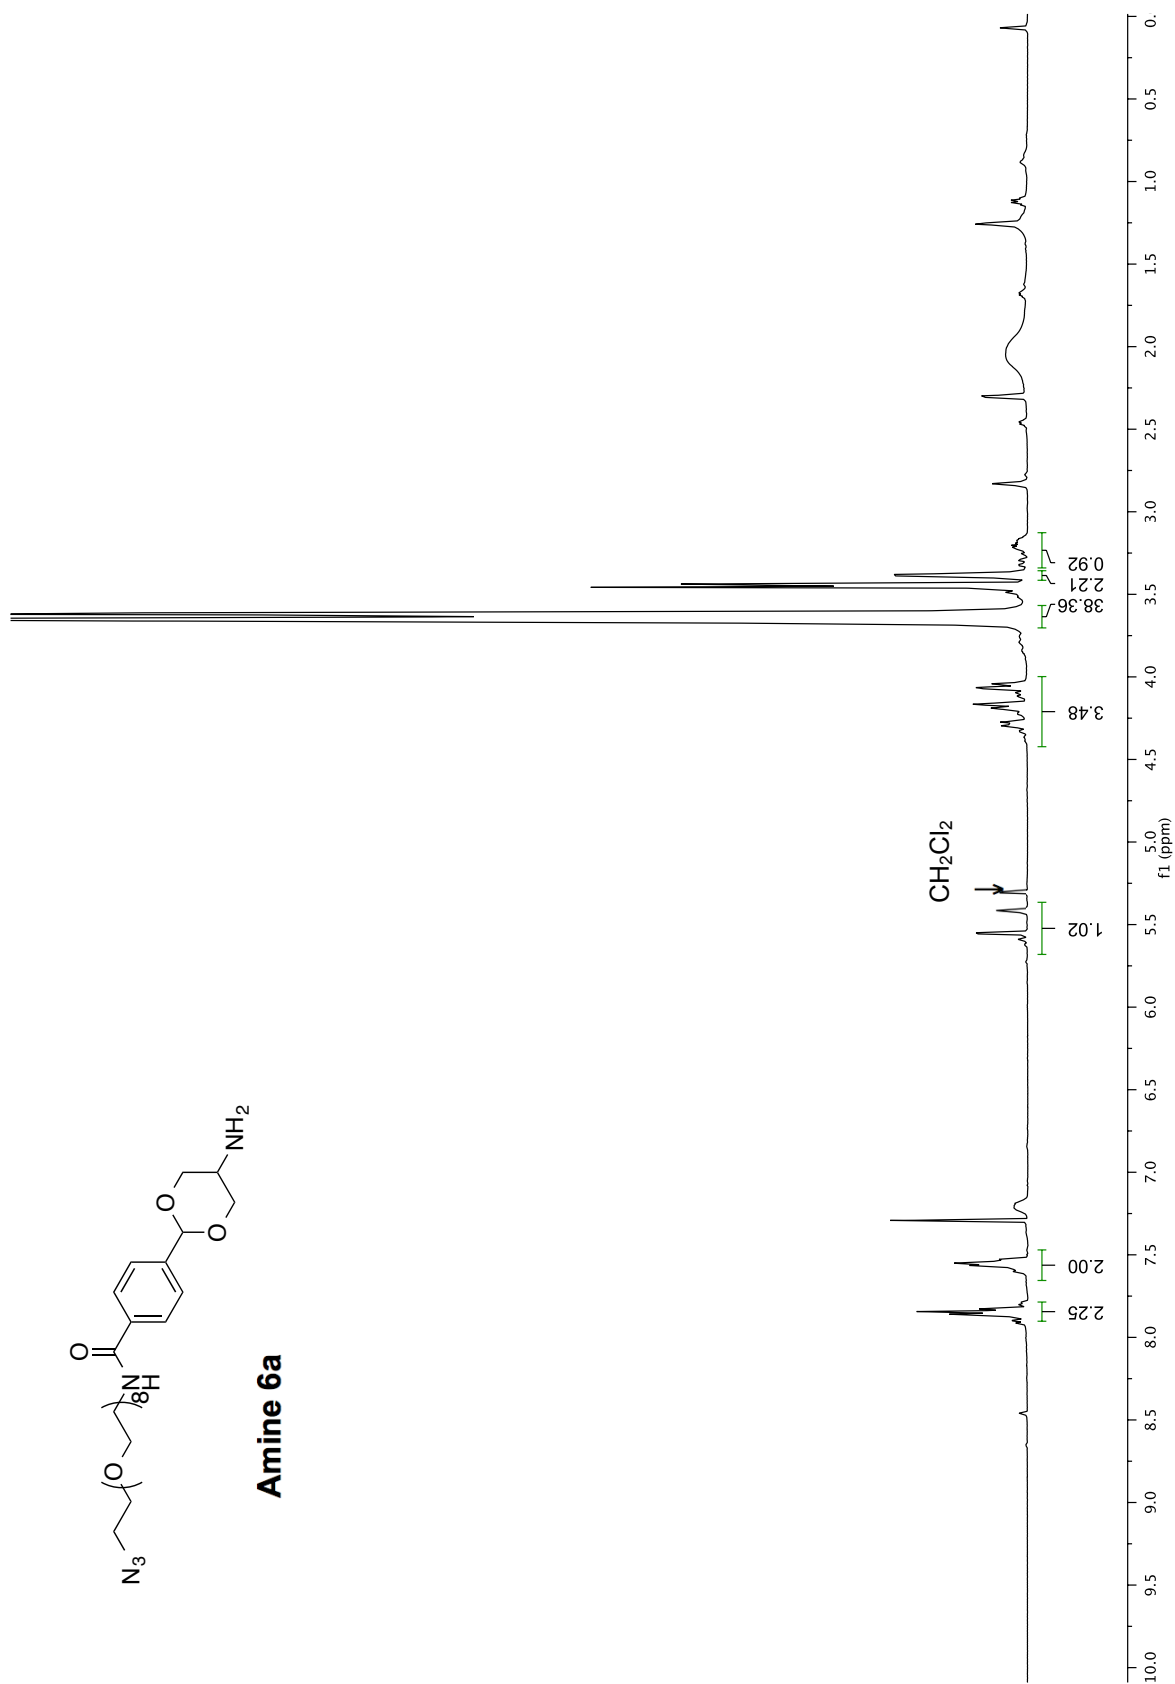

$^1\text{H}$  NMR Spectrum of **amine 6a**

<sup>13</sup>C NMR Spectrum of amine 6a

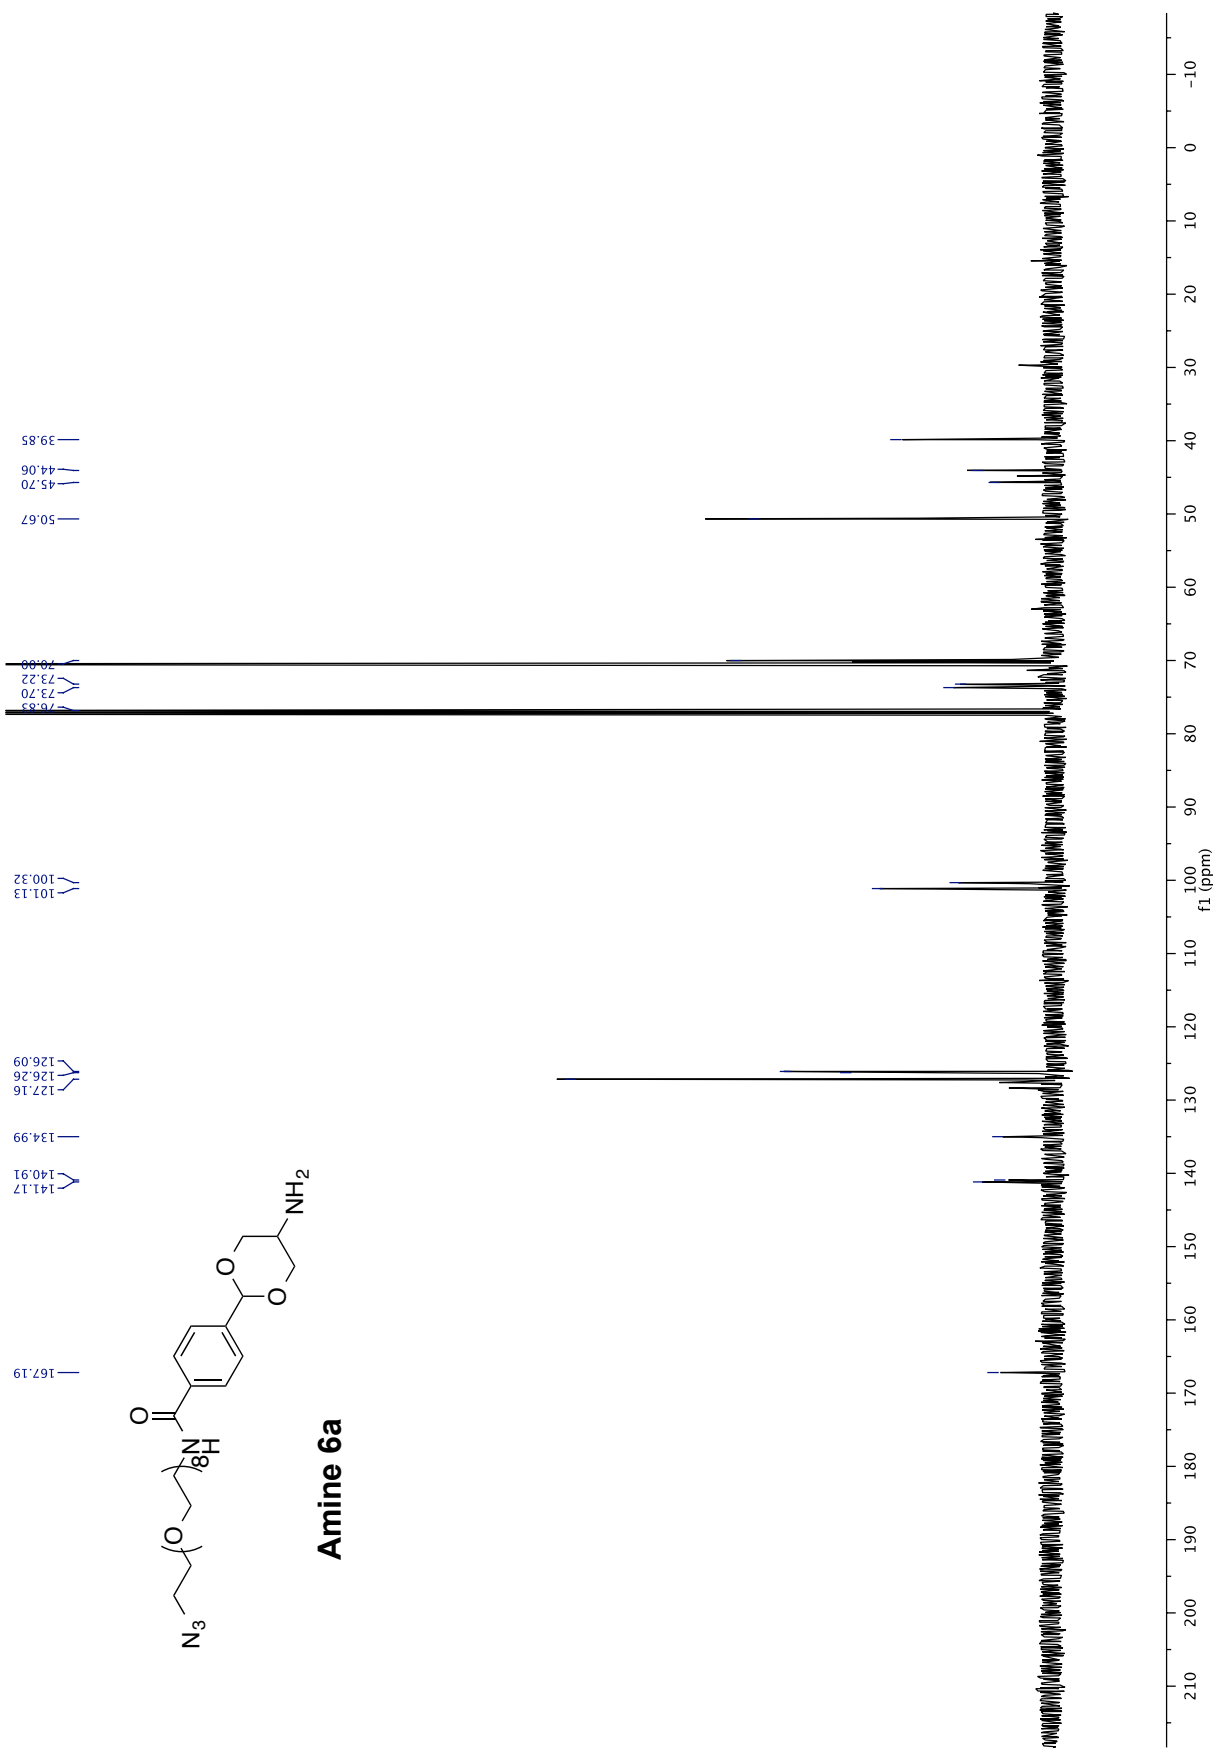

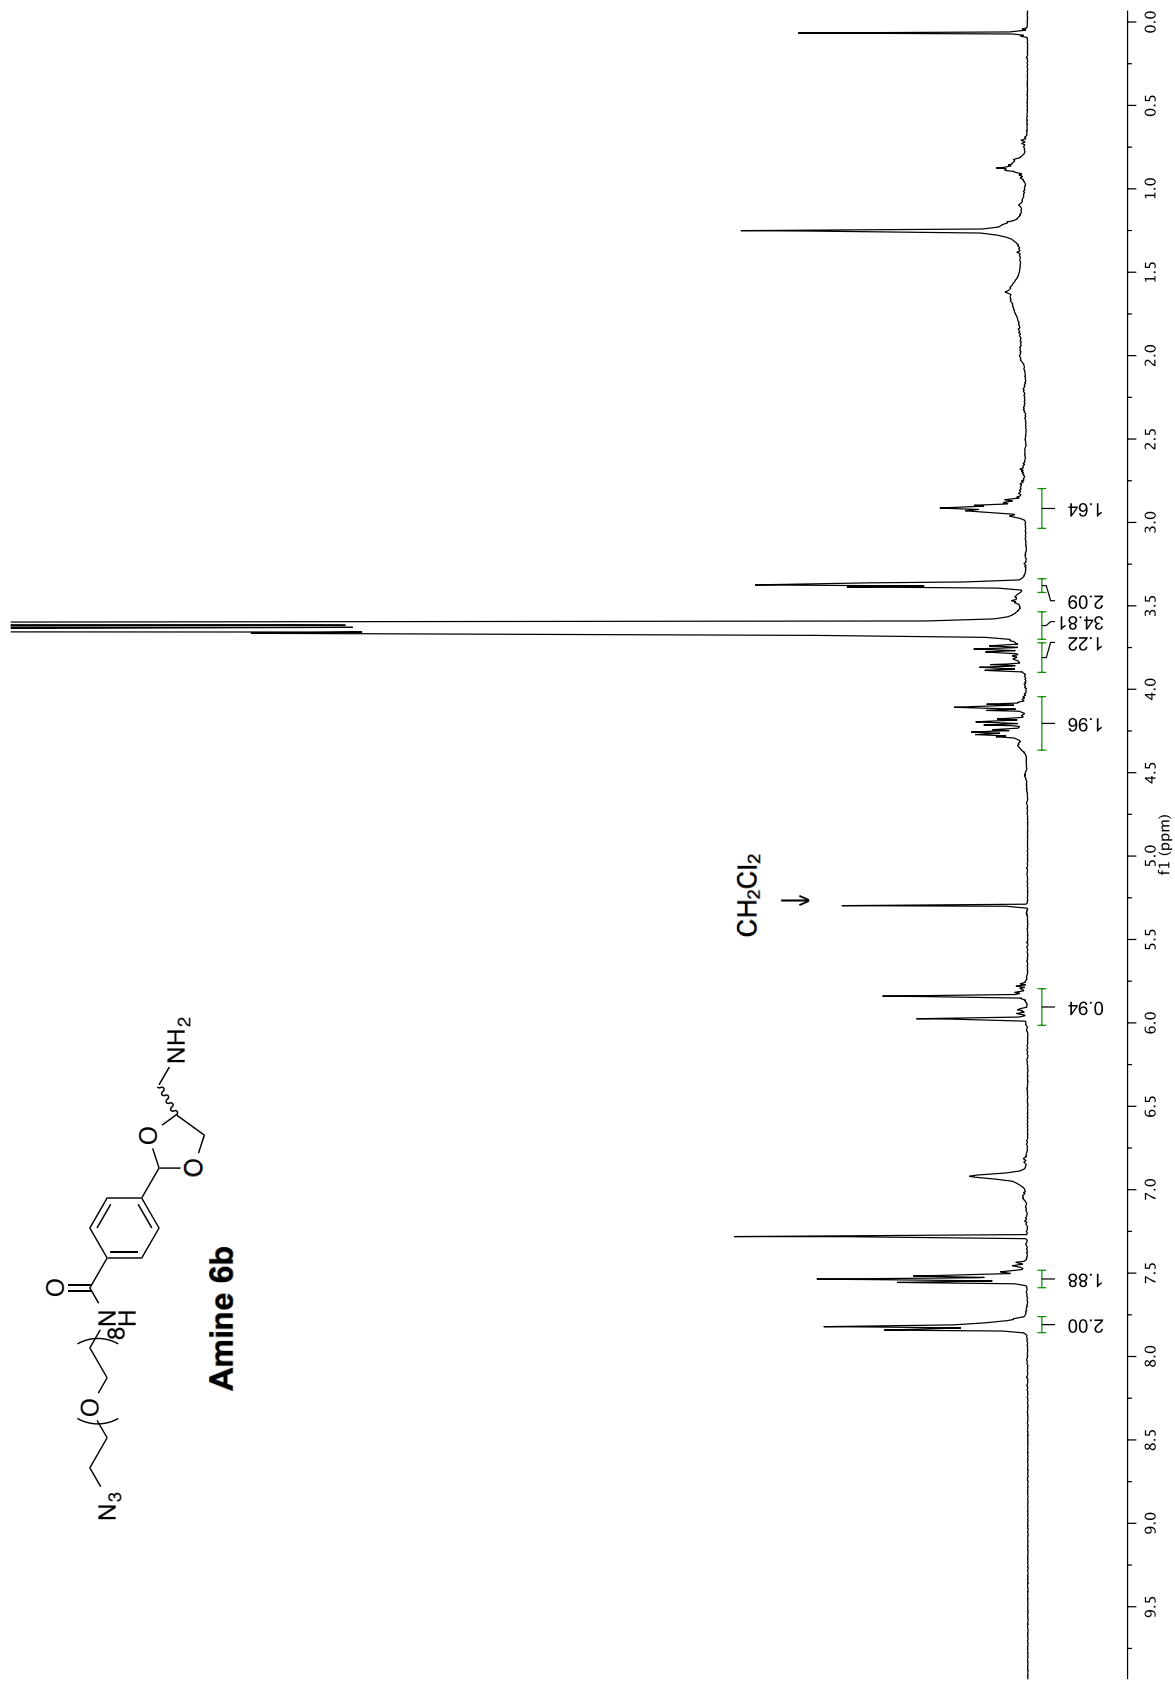

<sup>1</sup>H NMR Spectrum of **amine 6b**

<sup>13</sup>C NMR Spectrum of amine 6b

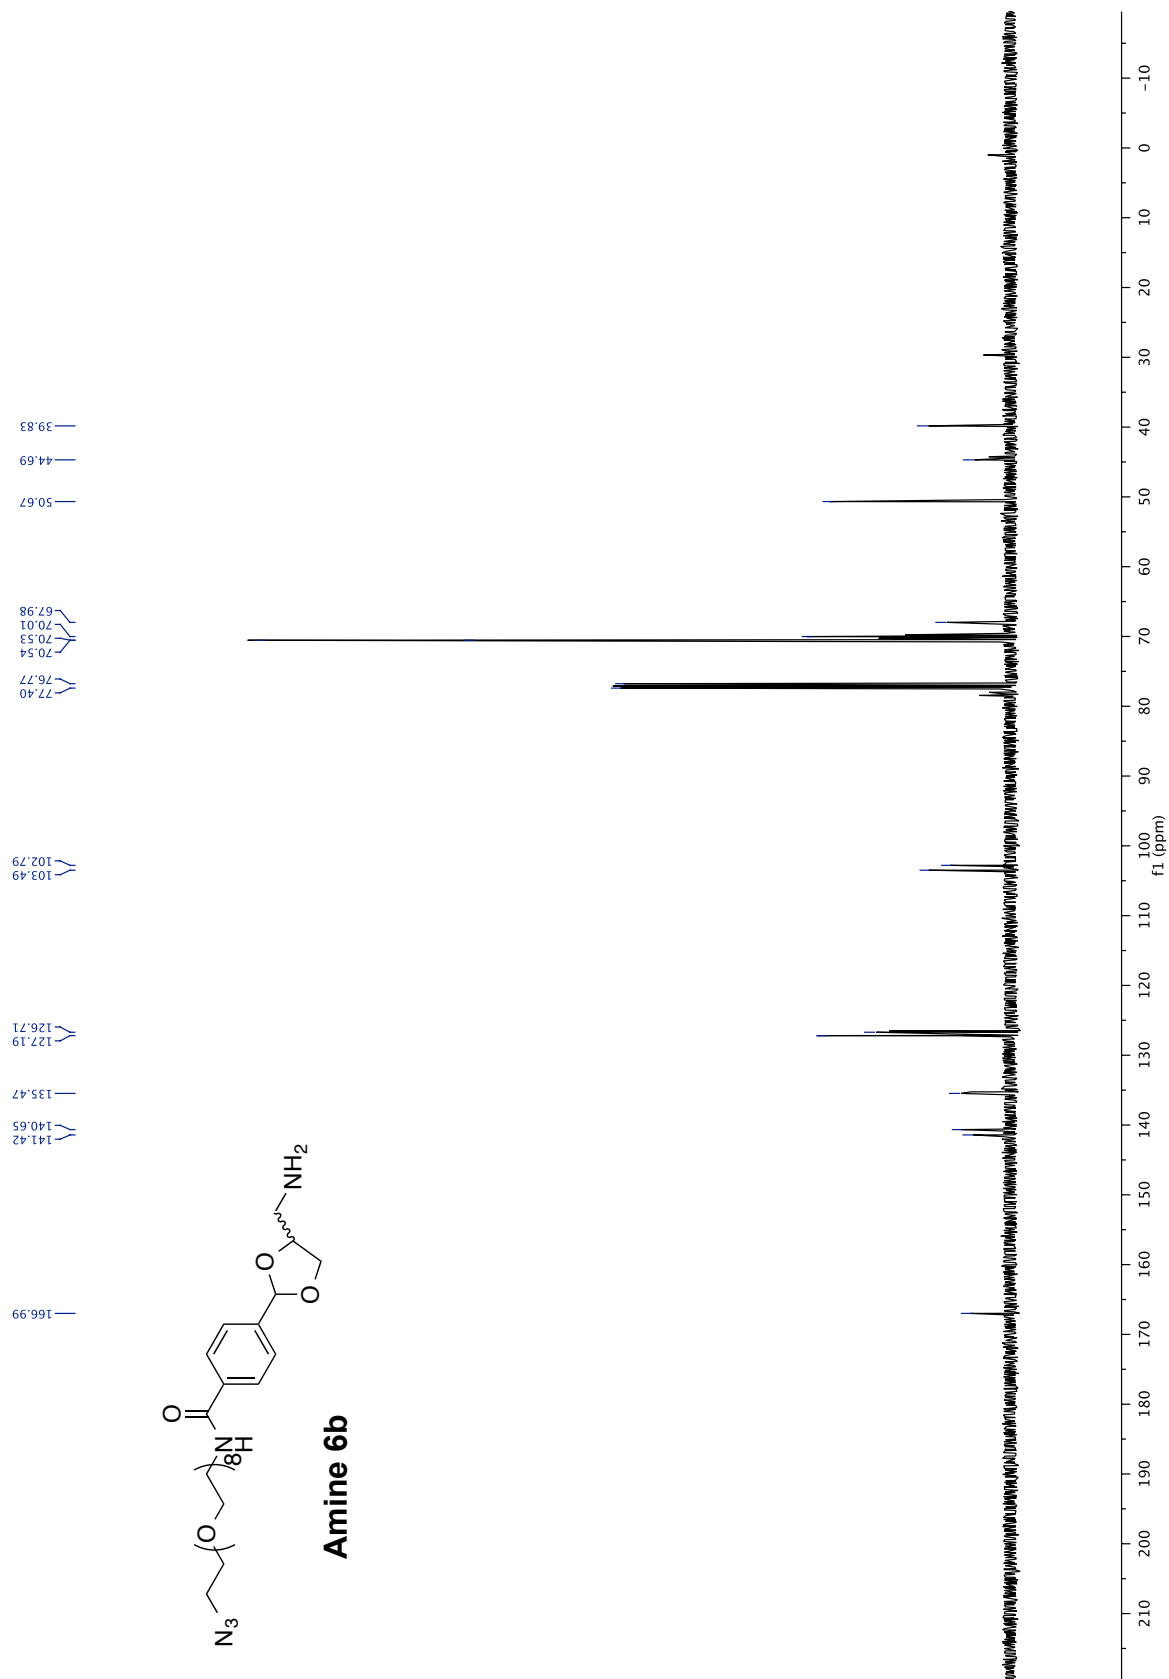

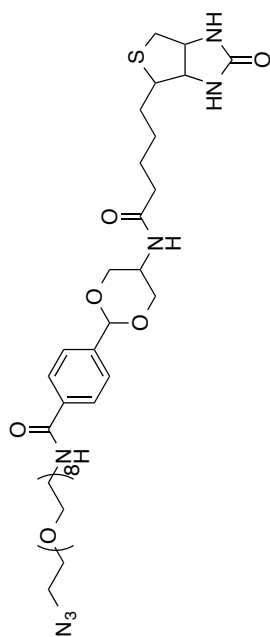

**Amide 7a**

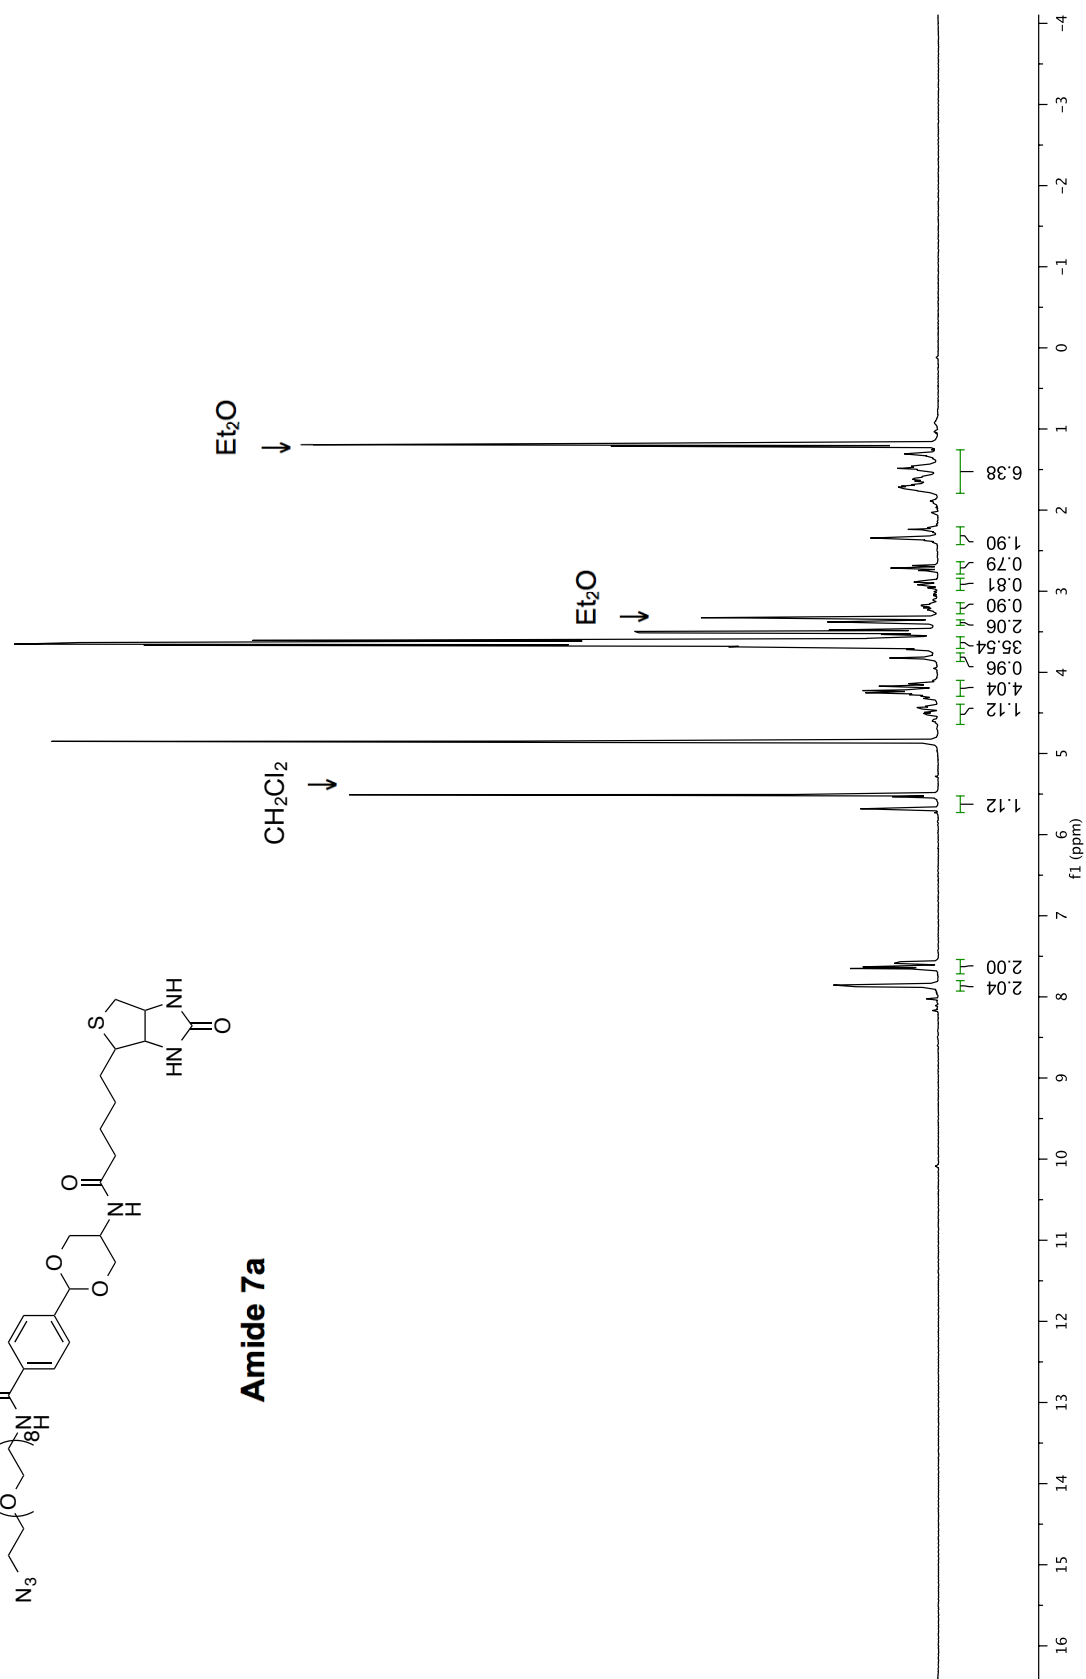

$^1\text{H}$  NMR Spectrum of **amide 7a**

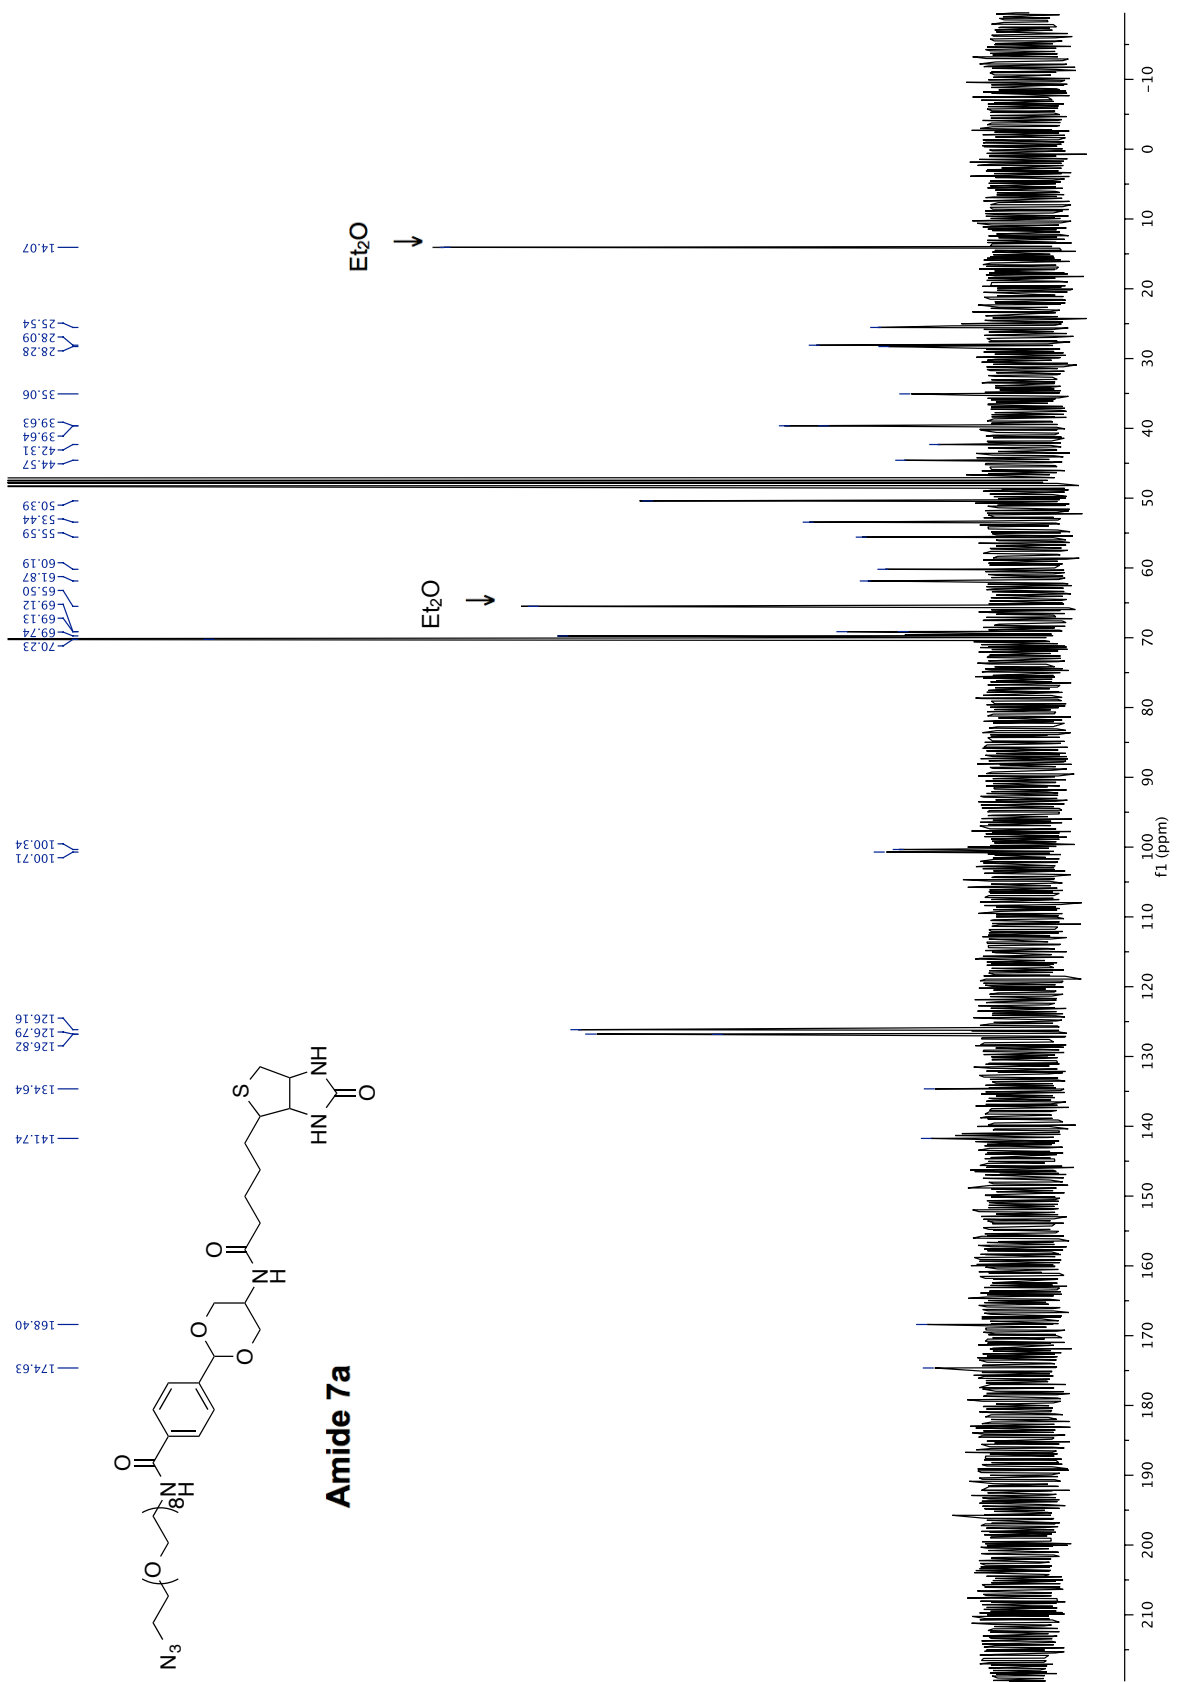

<sup>13</sup>C NMR Spectrum of **amide 7a**

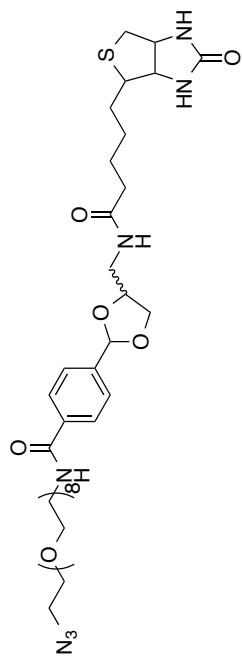

**Amide 7b**

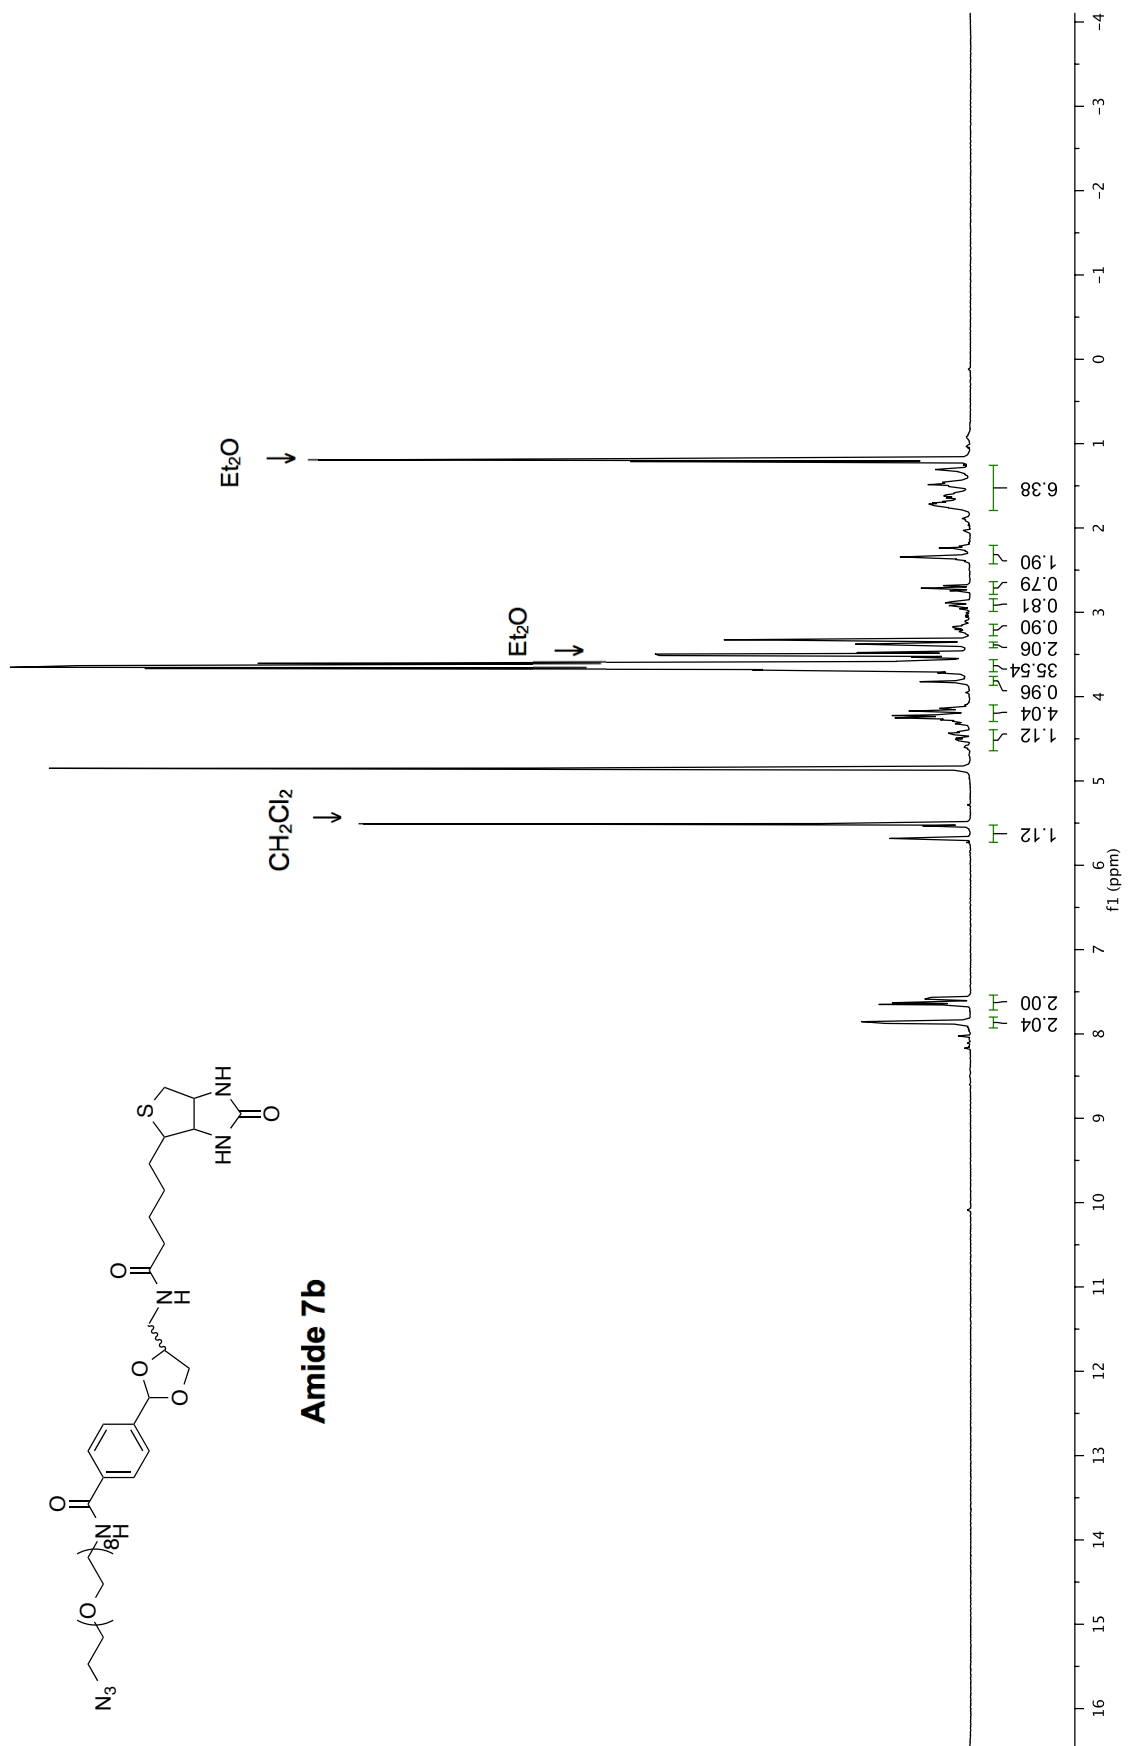

**<sup>1</sup>H NMR Spectrum of Amide 7b**

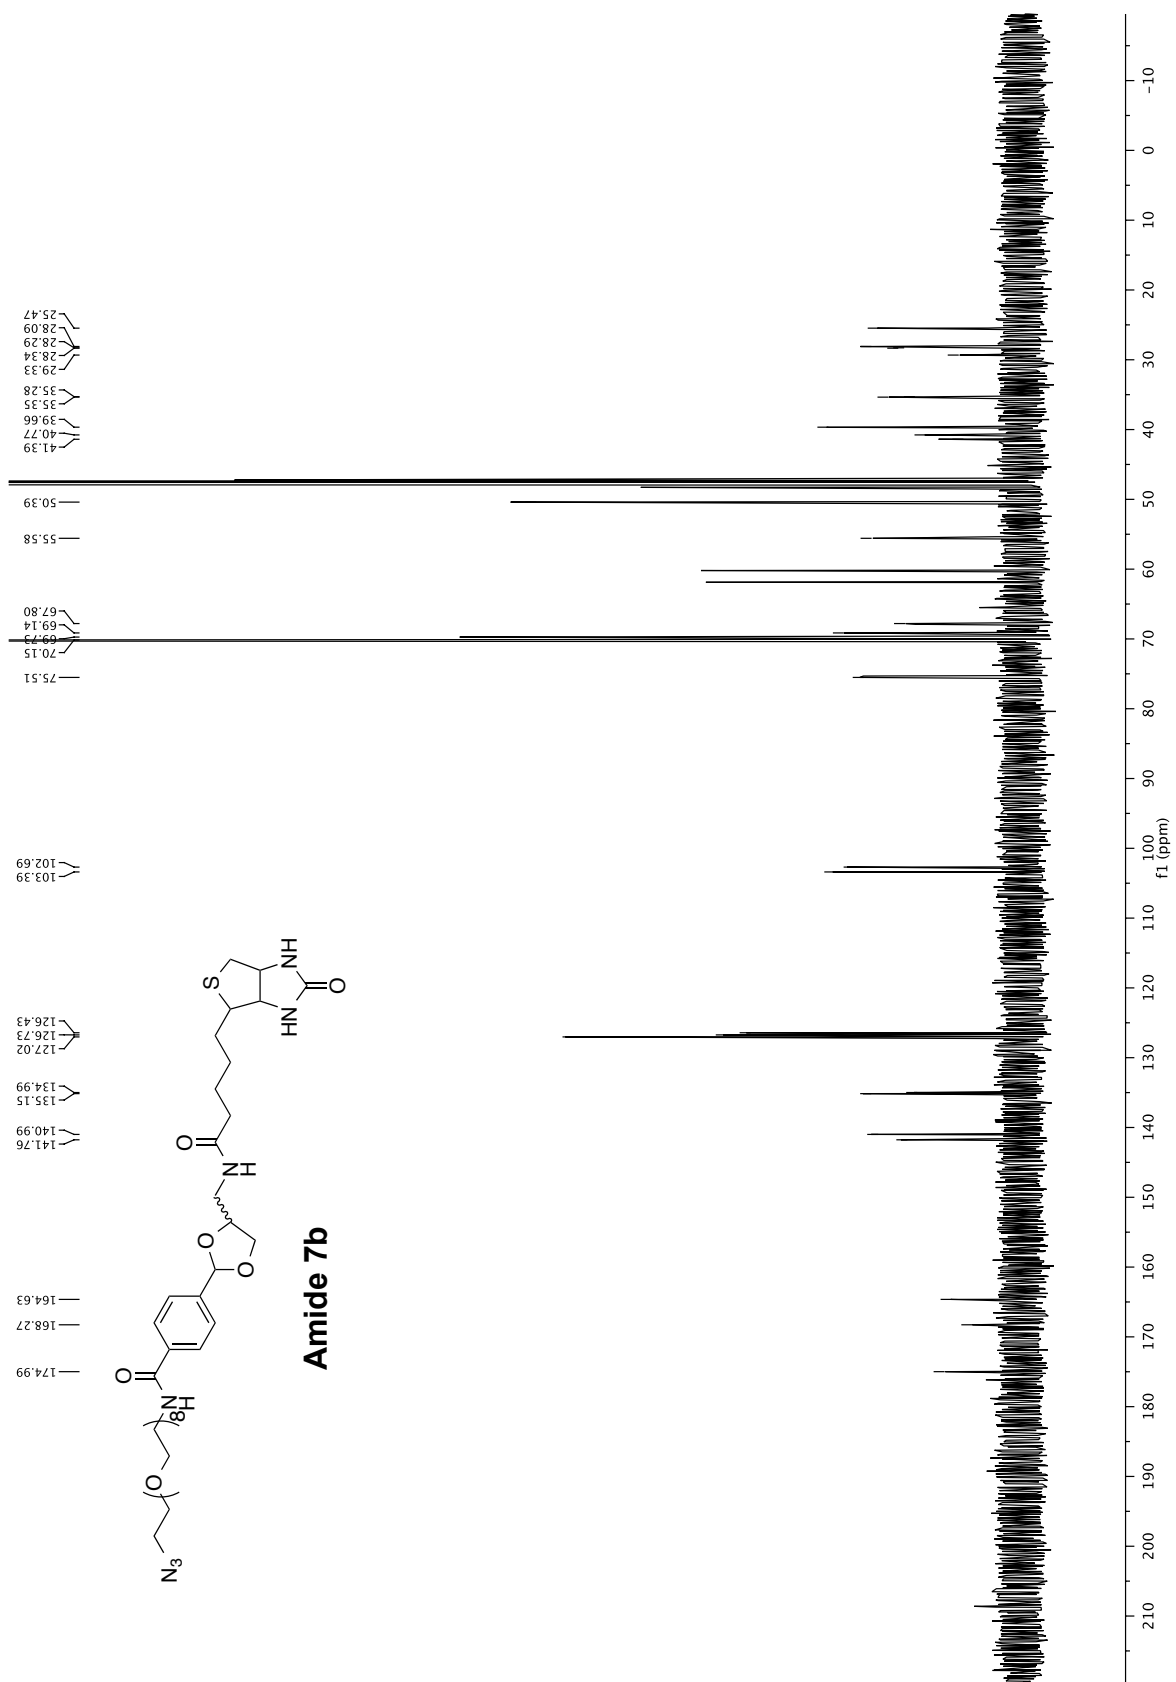

<sup>13</sup>C NMR Spectrum of **amide 7b**



<sup>1</sup>H NMR Spectrum of **amide 7c**

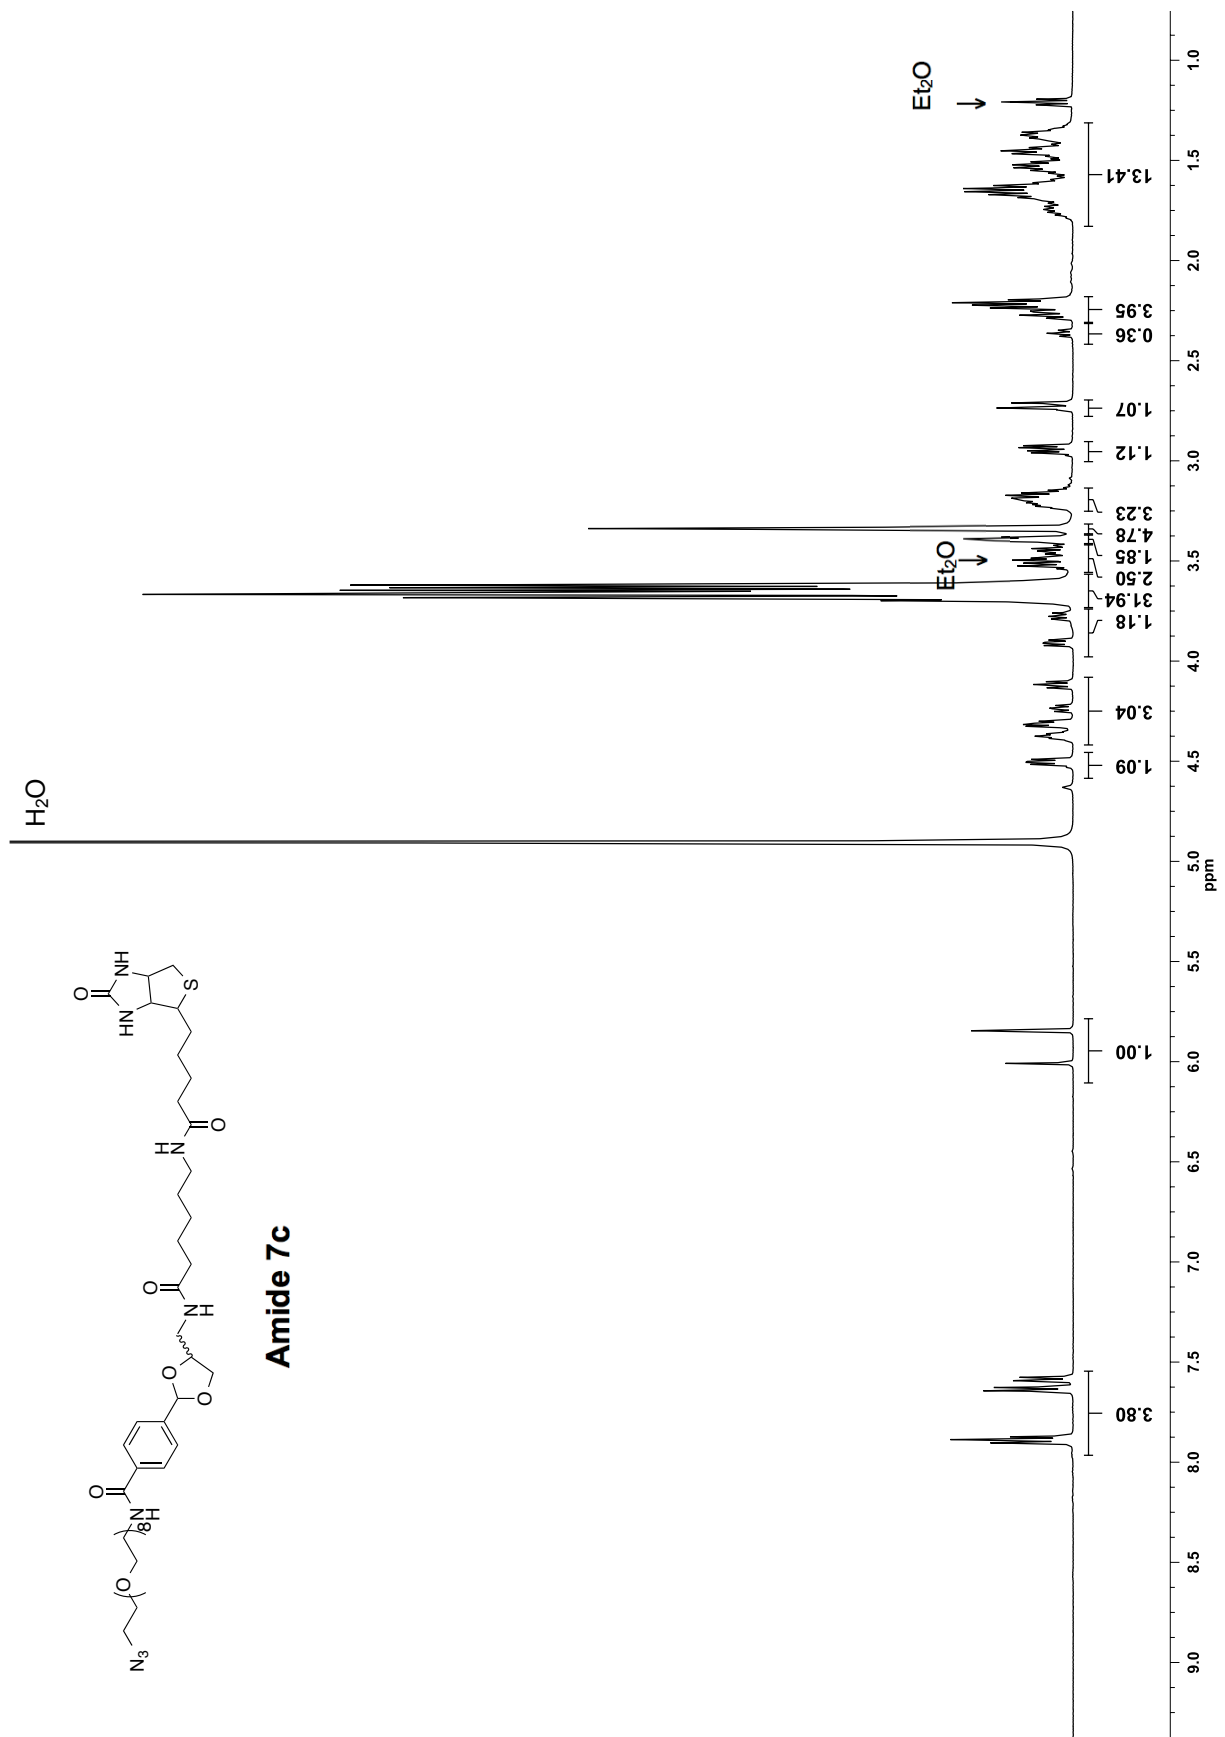

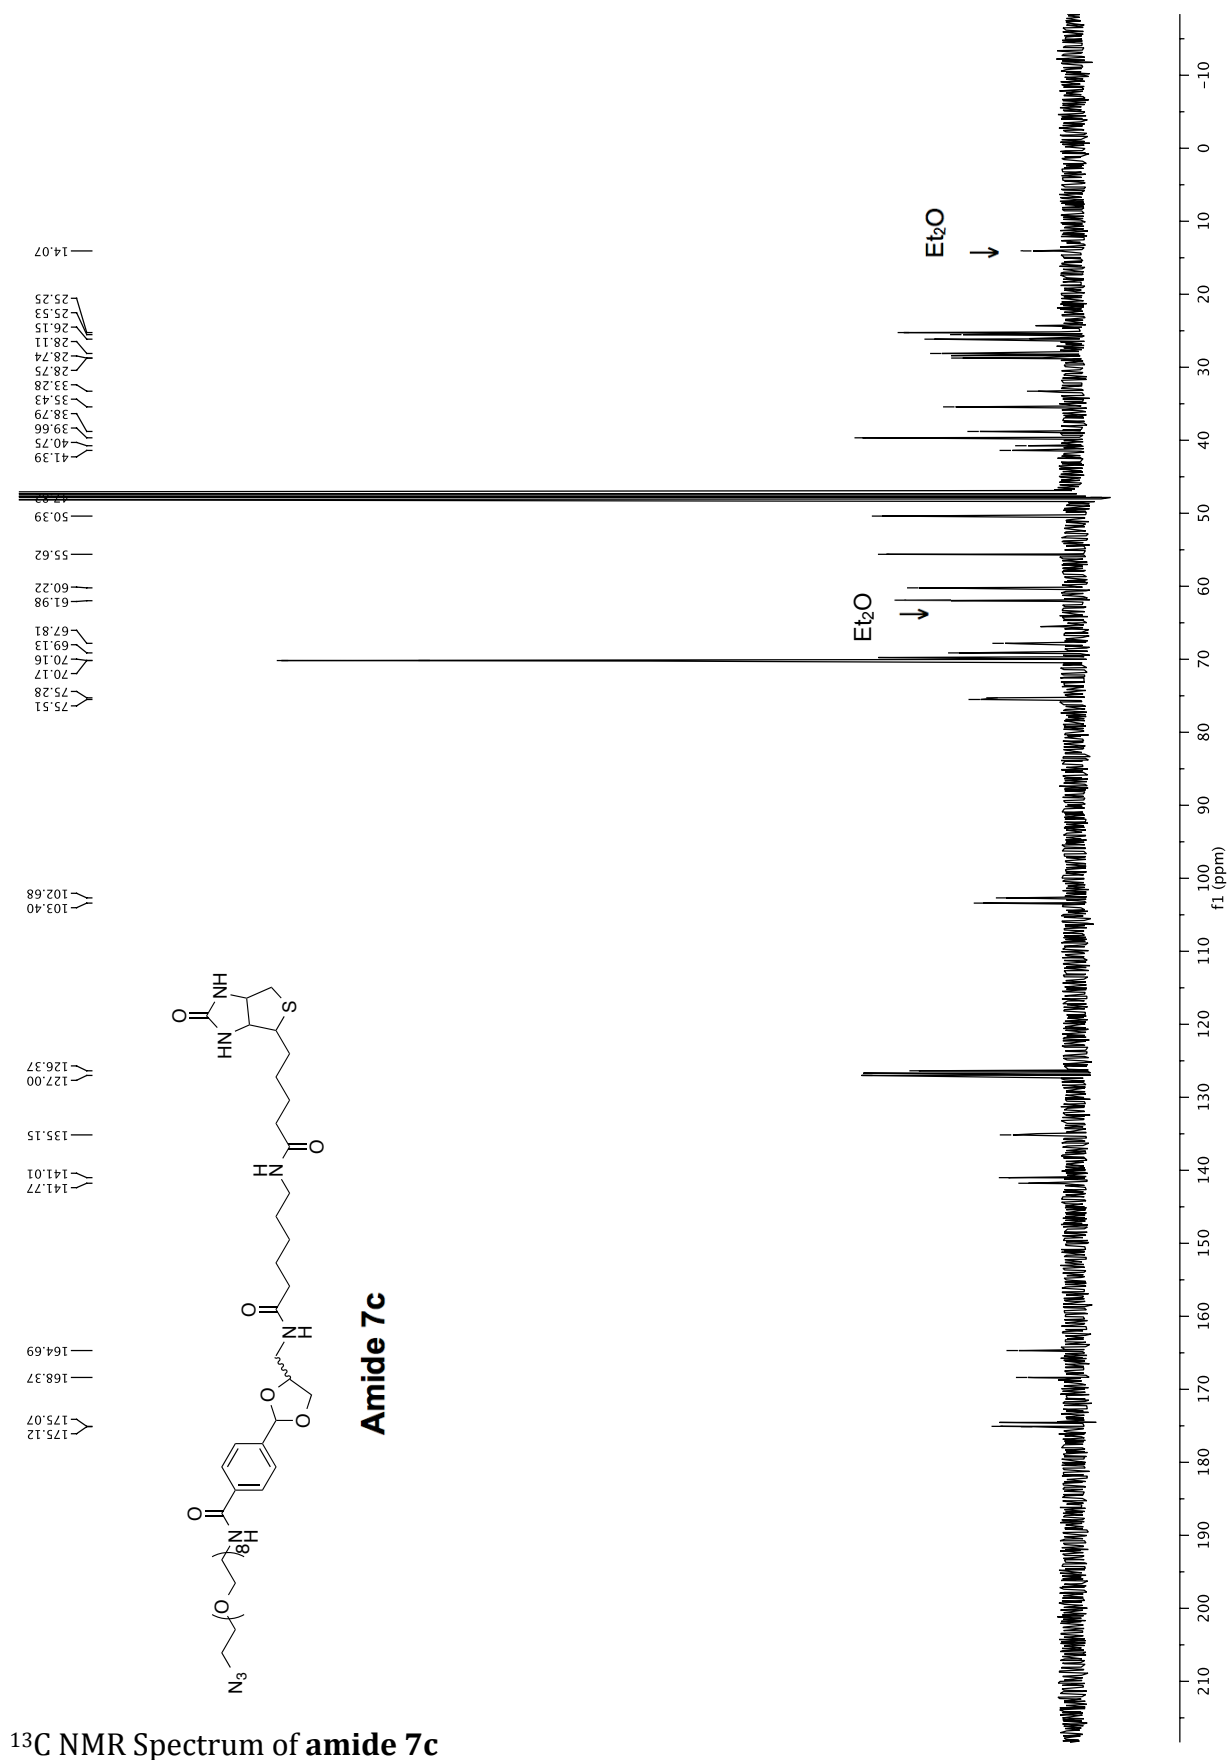

Supplement: c5ob01056j1.pdf [file c5ob01056j1.pdf]
